1  
2 **Title: Genetic influences on brain activation and large-scale functional**  
3 **connectivity during nociceptive processing: a twin study**  
4

5 **Authors:** Gránit Kastrati<sup>1,2</sup>, Jörgen Rosén<sup>3</sup>, William H. Thompson<sup>1</sup>, Xu Chen<sup>4</sup>, Henrik Larsson<sup>5</sup>,  
6 Thomas E. Nichols<sup>6</sup>, Irene Tracey<sup>7</sup>, Peter Fransson<sup>1</sup>, Fredrik Åhs<sup>2</sup> & Karin B. Jensen<sup>1\*</sup>

7  
8 **Affiliations:**  
9

10 <sup>1</sup>Department of Clinical Neuroscience, Karolinska Institutet, Stockholm, Sweden.

11 <sup>2</sup> Department of Psychology and Social Work, Mid Sweden University, Östersund, Sweden.

12 <sup>3</sup>Department of Psychology, Uppsala University, Uppsala, Sweden.

13 <sup>4</sup>Department of Biomedical Data Sciences, Leiden University Medical Center, the Netherlands.

14 <sup>5</sup> Department of Medical Sciences, Örebro University, Örebro, Sweden.

15 <sup>6</sup>Oxford Big Data Institute, Li Ka Shing Centre for Health Information and Discovery, Nuffield  
16 Department of Population Health, University of Oxford, Oxford, U.K.

17 <sup>7</sup> Wellcome Centre for Integrative Neuroimaging, Nuffield Department of Clinical  
18 Neurosciences, University of Oxford, Oxford, U.K.

19  
20  
21  
22  
23  
24  
25  
26 \*Correspondence to: Karin.Jensen@ki.se

27  
28 **Abstract**

29 Nociceptive processing in the human brain is a signal that enables harm avoidance, with large  
30 interindividual variance. The relative contributions of genes and environment to the neural  
31 structures that support nociception have not been studied in twins previously. Here, we employed  
32 a classic twin-design to determine brain structures influenced by additive genetics. We found  
33 genetic influences on nociceptive processing in the midcingulate cortex, bilateral posterior insulae  
34 and thalamus. In addition to brain activations, we found genetic contributions to large-scale  
35 functional connectivity during nociceptive processing. We conclude that additive genetics  
36 influence specific aspects of nociceptive processing, which improves our understanding of human  
37 nociceptive processing.

38  
39 **Introduction**

40 Nociceptive processing is important for survival as it provides an organism with information  
41 about potential or actual tissue damage. The neural processes underlying this capacity are

42 evolutionary conserved, as evolved nociceptive systems are observed in a variety of species  
43 (Walters & Williams, 2019). In humans, neuroimaging studies have established a large network  
44 of brain regions that consistently activate in response to nociceptive information (Jensen et al.,  
45 2016). Most such activations are evoked independently of type of nociceptive input and can be  
46 found in infants with minimal prior exposure to pain (Goksan et al., 2015). This suggests that  
47 genes modulate basic aspects of nociceptive processing in the human brain.

48  
49 There is considerable variation in nociception between individuals and attempts have been made  
50 to determine the genetic influence on such differences (Mogil, 2012). The genetic influence on  
51 sensitivity to experimental pain, for example, has been investigated by comparing identical and  
52 fraternal twins and estimated to 26% for heat- and 60% for cold-induced pain (Nielsen et al., 2008).  
53 Another study found similar genetic influence on individual sensitivity to pain, ranging from 22-  
54 55% depending on pain modality (Norbury, MacGregor, Urwin, Spector, & McMahon, 2007).  
55 Studies that link single-nucleotide polymorphisms to functional neuroimaging data e.g. (Oertel et  
56 al., 2008; Vachon-Preseu et al., 2016; Zubieta et al., 2003) and studies of rare genetic mutations  
57 that affect pain perception (Salomons, Iannetti, Liang, & Wood, 2016) suggest that our genes  
58 influence nociceptive processing, and our subjective experience of pain. Yet, the specific neural  
59 mechanisms and magnitude of such influence needs to be determined.

60  
61 The experience of pain likely involves cross-communication between both nociceptive and non-  
62 nociceptive brain regions (Geuter et al., 2020; Kucyi & Davis, 2015). To capture genetic influences  
63 on nociceptive processing, it is therefore relevant to move beyond mere activations in specific  
64 brain regions, to also consider their interactions. Recent advances in the neurosciences have seen  
65 a rapid increase in studies that model the brain as a large-scale network, which allows for  
66 estimating the degree of the interaction or cross-communication between brain regions and/or sub-  
67 networks (Bullmore & Bassett, 2011; Sporns, 2013). For example, the default-mode network that  
68 consistently activates during rest and deactivates when engaged in a task, show increased  
69 deactivation during painful tasks (Kong et al., 2010; Kucyi, Salomons, & Davis, 2013). Recent  
70 findings also show decreased functional connectivity between the primary somatosensory cortex  
71 and the default-mode network in chronic low back pain (Kim et al., 2019). Several studies have  
72 elucidated the relationship between genetics and functional brain network topology by means of  
73 functional Magnetic Resonance Imaging (fMRI), both for resting-state (Fornito et al., 2011; Glahn  
74 et al., 2010; Miranda-Dominguez et al., 2018; Reineberg, Hatoum, Hewitt, Banich, & Friedman,  
75 2019; Xu et al., 2017) and experimental tasks (Alstott, Breakspear, Hagmann, Cammoun, &  
76 Sporns, 2009; Colclough et al., 2017; Yang et al., 2016). Estimates of the genetic influence of  
77 resting-state brain networks are replicable across studies and imply genetic influences on large-  
78 scale networks (Adhikari et al., 2018).

79 In this study, we estimated the genetic influence on nociceptive processing in the brain. A total  
80 of 246 twins (56 identical pairs; 67 fraternal pairs) participated in a fMRI study that included an  
81 aversive conditioning paradigm using electrical shocks. The aim was to estimate the genetic  
82 influence on 1) neural responses in pain processing regions and 2) whole-brain functional  
83 connectivity during nociceptive processing, as described in our preregistration protocol  
84 (<https://osf.io/zesw5>). To achieve our first aim, we constrained our analysis to pain processing  
85 regions defined independently of the current study (Wager et al., 2013). Regarding the second  
86 aim, we used a whole-brain parcellation scheme to study pain-evoked functional connectivity.

87

## 88 **Materials and Methods**

### 89 *Subjects*

90 Twins between ages 20 and 60 years were recruited for the present study through the Swedish  
91 Twin Registry (STR). The STR contains more than 194 000 twins and represents an  
92 epidemiological resource for the study of genetic and environmental influences on human traits,  
93 behaviors, and diseases (<https://ki.se/en/research/the-swedish-twin-registry>). Twin pairs with  
94 known zygosity were selected based on their capability to undergo magnetic resonance imaging  
95 as well as screened for substance abuse, ongoing psychological treatment or medicine affecting  
96 emotion or cognition. Only same-sex twin pairs were included in this study and after initial  
97 screening, 305 participants were recruited to the study and underwent fMRI scanning. Imaging  
98 data were excluded from the analysis if one of the following criteria were fulfilled (i) excessive  
99 amount of head motion (more than 50 % of the data frames contained framewise displacement  
100 above 0.5 mm) (n=16). (ii) presence of outliers in terms of amplitude of brain responses. We here  
101 used the median absolute deviation method (Leys, Ley, Klein, Bernard, & Licata, 2013) to detect  
102 and outliers (here meaning a mean blood-oxygenated-level-dependent (BOLD) response deviating  
103 more than 3 times the medial standard deviation across the whole sample). Imaging data from  
104 participants deemed to be outliers were removed together with data from their co-twin and not used  
105 in the subsequent analysis (n=8). (iii) missing data / incomplete data collection from both twin  
106 pairs (n=35). The final sample (n=246) included 56 identical (35 female, 21 male) twin pairs (age:  
107 M=34, SD=8) and 67 fraternal (39 female, 28 male) twin pairs (age: M=33, SD=11). All  
108 participants provided written informed consent in accordance with the Uppsala Ethical Review  
109 Board Guidelines. Participants received reimbursement of SEK 1000 (roughly equal to 100 USD)  
110 for their participation.

### 111 *Brain imaging*

112 Imaging data were acquired using a 3.0 T scanner (Discovery MR750, GE Healthcare) and an 8-  
113 channel head-coil. Foam wedges, earplugs and headphones were used to reduce head motion and  
114 scanner noise. We acquired T1-weighted structural images with whole-head coverage,  
115 TR=2.4s, TE=2.8s, acquisition time 6.04 min and flip angle 11 (degrees). Functional images were  
116 acquired using gradient echo-planar-imaging (EPI), TR = 2.4 s, TE = 28ms, flip angle = 80  
117 (degrees), with 47 seven volumes acquired with slice thickness 3.0 mm<sup>3</sup> (no spacing, axial  
118 orientation, phase-encoding direction A/P). The slices were acquired in an interleaved ascending  
119 order. Higher order shimming was performed, and five dummy scans were acquired before the  
120 experiment.

### 121 *Stimuli and Contexts*

122 Visual stimuli were presented on a flat screen in the MR scanner via a projector (Epson EX5260)  
123 (Fig. S1). The computer running the stimulus presentation used a custom version of Unity (version  
124 5.2.3, Unity Technologies, San Francisco, CA) and communicated with BIOPAC for electrical  
125 stimuli (BIOPAC Systems, Goleta, CA) through a parallel port interface. The software for the  
126 parallel port interface was custom made and used standard .NET serial communication libraries  
127 by Microsoft (Microsoft Corporation, Albuquerque, New Mexico).

### 128 *fMRI paradigm design*

129 Noxious electrical stimuli were administered as part of a fear conditioning procedure. The  
130 paradigm was used to test genetic aspects of fear acquisition and results that focus on neural  
131 responses to trials that did not include an electrical shock will be reported elsewhere. Two virtual  
132 characters served as visual stimuli (CS) and were presented at a distance of 2.7 m projected on a  
133 screen in the MR scanner (Fig. S1). One of the virtual characters served as the aversive cue (CS+)  
134 and preceded the electrical stimuli whereas the other virtual character served as a safety cue (CS-  
135 ). Stimuli serving as CS+ and CS- was counterbalanced across participants. Each of the cues  
136 appeared for 6s. Participants were not told which character would be associated with electrical  
137 shocks. Prior to the conditioning phase, a habituation phase took place, during which each CS was  
138 presented four times without any electrical shocks. During conditioning, each cue type was  
139 displayed 16 times. Eight of the aversive cues co-terminated with presentation of the electrical  
140 shock (US) and eight of the aversive cues did not include a shock. Four stimulus presentation  
141 orders were used to counterbalance the timing of CSs across subjects. An inter-stimulus interval  
142 (randomized jittering) followed each trial, with no cues present for 8-12s. Total duration for the  
143 conditioning task was 9 minutes and 47 seconds. The initial 8 presentations (habituation) were not  
144 considered for this analysis.

145 The electrical shocks were delivered to the distal part of the participant's left volar forearm  
146 (adjacent to the wrist) via radio-translucent disposable dry electrodes (EL509, BIOPAC Systems,  
147 Goleta, CA). As the present study also served to investigate fear acquisition, i.e., neural responses  
148 to trials that did not include electrical stimulation) (to be published elsewhere), the US presentation  
149 was brief (16 ms). Shock delivery was controlled using the STM100C module connected to the  
150 STM200 constant current stimulator (BIOPAC Systems, Goleta, CA), using a unipolar pulse with  
151 a fixed duration of 67 Hz. The physical voltage was individually calibrated before the experimental  
152 task using an ascending staircase of electrical currents until shocks were rated as 'aversive' (Rosen,  
153 Kastrati, Reppling, Bergkvist, & Ahs, 2019). After finding the physical voltage that participants  
154 rated as aversive, this parameter was kept constant throughout the experiment. The determined  
155 average electrical voltage was  $M=31V$ ,  $SD=7$  across participants.

#### 156 *Analysis of fMRI imaging data*

157 Analyses of fMRI-data were performed using SPM12 (Wellcome Department of Cognitive  
158 Neurology, University College, London, <https://www.fil.ion.ucl.ac.uk/spm>). Preprocessing of  
159 functional image volumes included interleaved slice time correction, realignment, co-registration  
160 to the T1-weighted image, spatial normalization to Montreal Neurological Institute (MNI) space  
161 (MNI152NLin6Asym), and spatially smoothed with an 8mm Gaussian kernel.

162 In the first-level analysis, an event-related approach was used to estimate BOLD responses during  
163 nociceptive processing. Three event types were modeled, using separate regressors: the aversive  
164 cue that preceded the US (CS+US), the same CS+ that did not precede the US (CS+no US), and the  
165 electrical shock itself (US). Note that the aversive cue (CS+) co-terminated with the onset of the  
166 US 50% of the times. The duration of the visual cue (CS+) was set to 6 seconds and the US to 3  
167 seconds. The first-level contrast for each participant that was latter used to estimate the genetic  
168 influence  $h^2$  on nociceptive processing per se was modeled as (CS+US & US > CS+no US). Since the  
169 aversive cue (CS+US) was immediately followed by the US, without any delay, the CS+US and US  
170 were combined. The same visual cue (CS+no US), not followed by the US, was then subtracted in  
171 order to estimate the neural correlates to nociceptive processing *per se*. The group-level result for  
172 the same contrast is found in Table S1 and Fig. S2. The statistical significance threshold was set

173 to  $P < 0.05$ , family-wise error corrected (FWE) for multiple comparisons. Anatomical labeling of  
174 significantly activated brain regions were performed using the SPM Anatomy toolbox v.2.2c  
175 (Tzourio-Mazoyer et al., 2002).

#### 176 *Defining the functional connectome in response to nociceptive input*

177 To investigate task-specific functional connectivity, the CONN functional connectivity toolbox  
178 was used (Whitfield-Gabrieli & Nieto-Castanon, 2012) (<http://www.nitrc.org/projects/conn>,  
179 version 18b). As input to the CONN toolbox, we used the same preprocessing pipeline as outlined  
180 above except for removing the spatial smoothing. This decision was to minimize a spurious  
181 increase in local connectivity that would be induced otherwise. Subsequently, image data  
182 underwent ART-based outlier detection of volumes (version 2015-10) followed by image  
183 scrubbing. For the scrubbing procedure, we used a liberal threshold of the 99<sup>th</sup> percentile of  
184 normative sample, with a global-signal  $z$ -value threshold of 9 standard deviations and a subject  
185 motion threshold of 2mm. Next, confounders were removed from the data. These consisted of the  
186 effect of each task (in order to remove constant task-induced responses in the BOLD signal),  
187 cerebrospinal fluid, white matter, SPM covariates (6 motion parameters and their quadratic effect)  
188 and regressors for scrubbing per individual (one regressor for each volume deemed a potential  
189 outlier; from zero to a maximum of 25 regressors per individual). Finally, image data was low-  
190 pass filtered [0.008, 0.09]. BOLD time-series were extracted using a parcellation scheme with 400  
191 nodes (Schaefer et al., 2018). We computed first-level weighted ROI-to-ROI functional  
192 connectivity (wFC) by computing task-specific bivariate correlation using weighted Least Squares  
193 (WLS), with weights defined as condition timeseries convolved with a canonical hemodynamic  
194 response function. Results were Fisher-transformed correlation coefficients between each pair of  
195 nodes. The first-level contrasts were modelled in the same way as described above for brain  
196 activations (CS+US & US > CS+no US). Fig. 2A and 2C shows the group-level result for the same  
197 contrast. For visualization purpose, we computed the within-network and between-network sum  
198 of functional connectivity between each pair of networks (Fig. 2C). For each network, say  $A$  and  
199  $B$ , we sum the functional connectivity between  $A$  and  $B$  and divide by the number of nodes  
200 contained in the two networks. If  $A=B$ , the result is the sum of the within-network connectivity;  
201 otherwise, the result is the between-network connectivity.

#### 202 *Estimation of genetic influences on brain function*

203 *Exclusion of outliers:* We identified univariate outliers in our data sample using the median  
204 absolute deviation method (Leys et al., 2013). Any participant with a mean BOLD response  
205 deviating more than 3 times the median standard deviation was removed as well as their respective  
206 twin (number of participants removed = 8). Included in the final analysis was a sample of 56  
207 monozygotic (35 females, 21 males) and 67 dizygotic (39 females, 28 males) twin pairs.

208 In brief, the phenotypic variance can be decomposed into additive genetic variance ( $A$ ) as genetic  
209 effects for a phenotype or trait that add up linearly, common or shared environmental variance ( $C$ )  
210 and unique environmental, or error variance ( $E$ ) (Falconer & Mackay, 1996). Using the simplest  
211 Falconer's formula, the  $A$ ,  $C$ , and  $E$ -factors can be estimated by contrasting monozygotic-twin pair  
212 correlations with dizygotic-twin pair correlations. The  $A$ -factor can be identified because  
213 monozygotic-twins are genetically identical while dizygotic-twins share 50% of their co-  
214 segregating alleles on average. Additionally, we assume that a shared environmental contribution  
215 ( $C$ ) is equally shared within pairs regardless if they are monozygotic or dizygotic twins. Finally,



216 any variance not attributable to factors shared between twins (A and C), i.e., that make twins in  
217 pairs dissimilar, in the model assigned to the E-factor. The genetic influence ( $h^2$ ), is the proportion  
218 of a phenotypic variance explained by additive genetic effects, i.e.  $h^2$  is equal to  $A/(A+C+E)$ . In  
219 the present study, we computed heritability using the APACE software package (Accelerated  
220 Permutation Inference for the ACE model) (Chen et al., 2019). APACE uses a non-iterative linear  
221 regression-based method based on squared twin-pair differences, with permutation-based multiple  
222 testing correction to control the family-wise error rate. For the mass-univariate analysis, for each  
223 first-level contrast described above, we used the Neurologic Pain Signature as *a priori* template  
224 for regions in which to test for significant differences in genetic influences between twin groups  
225 (Wager et al., 2013). The number of permutations was set to 1000 and we used the cluster-based  
226 inference in the APACE (Accelerated Permutation Inference for ACE models) software package  
227 (Chen et al., 2019) with cluster-forming threshold set to  $p < 0.05$  based on the parametric likelihood  
228 ratio null-distribution. We additionally computed an estimate of the genetic influence of choice of  
229 threshold for the electrical stimulation using the mets package (Holst, Scheike, & Hjelmberg,  
230 2016; Scheike, Holst, & Hjelmberg, 2014) implemented in R (R Core Team, 2017).

### 231 *Estimating the genetic effect on the functional connectome*

232 All individual-level functional connectivity matrices ( $CS_{+US}$  &  $US > CS_{+no US}$ ) were entered into  
233 APACE (Chen et al., 2019) and the genetic influences was computed by fitting the model to each  
234 edge in the matrices. This resulted in a 400 by 400 symmetric matrix with  $h^2$  estimated for each  
235 edge. Subsequently, we used a method based on network-based statistics (Zalesky, Fornito, &  
236 Bullmore, 2010) to compute a significant cluster or ‘largest connected component’ of the  $h^2$  matrix.  
237 We ran 1000 iterations and re-computed the 400x400  $h^2$  matrix with permuted twin identity.  
238 Finally, we computed the largest connected component of our observed  $h^2$  matrix and compared  
239 to the distribution of randomly generated  $h^2$  matrices, determining significance at  $\alpha = 0.05$ . Of  
240 note, the network-based statistics approach requires a choice of a threshold for which below all  
241 values are set to zero and all values above are set to one. The usage of thresholds that are set too  
242 conservatively typically results in network components that are too small to be deemed significant  
243 compared to random networks. On the other hand, thresholds that are set too low results in very  
244 large network components that are biologically unrealistic. We found that the largest component  
245 broke at  $h^2 = 0.328$ , however we show that there are larger components that are significant by  
246 computing components over several thresholds from  $h^2 = 0.25$  up to 0.32 in steps of 0.01 (see Fig.  
247 S5). For interpretability, we chose the component from the largest threshold, denoted the  $h^2$ -  
248 component ( $h^2 = 0.328$ ) for visualization. To further aid interpretability, we computed the sum of  
249 within-network and between-network edges in the  $h^2$ -component (Fig. 2D). All brain graphs were  
250 visualized using BrainNet Viewer (Xia, Wang, & He, 2013). Node labeling was done with the  
251 automated anatomical labeling (AAL) (Tzourio-Mazoyer et al., 2002) by taking the coordinates  
252 from the Schaefer parcellation (Schaefer et al., 2018) that overlap between the AAL and the  $h^2$ -  
253 component.

### 254 *Notes on the preregistration*

255 The aim of the current study as stated in the preregistration (<https://osf.io/zesw5>) was to  
256 characterize the genetic influence on functional connectivity in pain related brain regions. Our  
257 first approach was to use the automated online meta-analysis tool Neurosynth (Yarkoni,  
258 Poldrack, Nichols, Van Essen, & Wager, 2011) to determine the brain regions of interest. We  
259 here instead decided to use the Neurologic Pain Signature (Wager et al., 2013), since it is more

260 well-defined and validated. In addition, instead of focusing the functional connectivity between  
261 brain regions related to pain, we took a whole-brain approach. This way, we could estimate the  
262 genetic influence on functional interactions between nociceptive and non-nociceptive brain  
263 regions. We decided furthermore to use weighted functional connectivity instead of generalized  
264 psychophysiological interactions (McLaren, Ries, Xu, & Johnson, 2012) since the former is  
265 conceptually simpler and sufficed for the present purpose. Finally, the permutation test based on  
266 network-based statistics (Zalesky et al., 2010) was added later, since element-wise (per edge)  
267 estimates of genetic influence assumes independence between edges, and would also match the  
268 cluster-based statistics from the univariate analysis.

269

## 270 Results

### 271 *Genetic influence on brain activations during nociceptive processing*

272 In response to nociceptive stimuli, we detected local increases in blood-oxygenated level-  
273 dependent (BOLD) fMRI signals in the bilateral anterior insulae, bilateral posterior insulae,  
274 cingulate cortex, thalamus, cerebellum, and the right amygdala ( $p < 0.05$ , FWE corrected). For a  
275 full representation of all regions activated during nociceptive processing see *SI Appendix*, Table  
276 S1 and *SI Appendix*, Fig. S2. Estimates of the genetic influence on brain responses during  
277 nociceptive processing was constrained to brain regions defined by the Neurologic Pain Signature  
278 (Wager et al., 2013). Using permutation tests to assess the degree of genetic influence ( $h^2$  ranging  
279 from 0 to 1) on brain activation patterns (Chen et al., 2019), we found significant effects in the  
280 right (contralateral) postcentral gyrus ( $h^2 = 0.52$ ), right posterior insulae ( $h^2 = 0.50$ ), right superior  
281 temporal gyrus ( $h^2 = 0.45$ ), right supramarginal gyrus ( $h^2 = 0.44$ ), left postcentral gyrus ( $h^2 = 0.54$ ),  
282 left supramarginal gyrus ( $h^2 = 0.52$ ), left posterior insulae ( $h^2 = 0.43$ ), left superior temporal gyrus  
283 ( $h^2 = 0.43$ ), left anterior cingulate cortex ( $h^2 = 0.46$ ), right posterior-medial frontal gyrus ( $h^2 =$   
284  $0.41$ ) and bilateral midcingulate cortex ( $h^2 = 0.40$ ) (Fig. 1) (see *SI Appendix*, SFig. 3 for an  
285 unthresholded image of the genetic influence, and *SI Appendix*, SFig. 4 for twin-pair correlations).

286

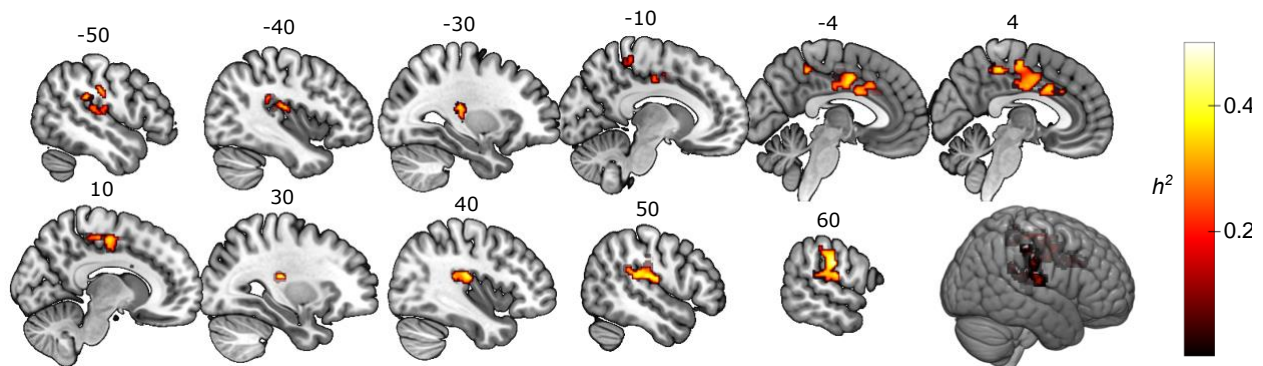

287

288 **Fig. 1.** Twin-data brain regions with genetic influences during nociceptive processing. Sagittal  
289 view of clusters with significant genetic influence, including the contralateral somatosensory  
290 cortex, bilateral dorsal posterior insulae, anterior and midcingulate cortex. The threshold was set  
291 at  $p < .05$ , FWE-corrected for multiple comparisons at the cluster-level. The heat bar represents  $h^2$   
292 heritability values.

293

**Table 1.** Genetic influence,  $h^2$  during nociceptive processing ( $P < 0.05$ , family-wise error corrected). R = right hemisphere, L = left hemisphere.

| Area of Local Maximum      | $h^2$ | MNI |     |    | Voxels in cluster |
|----------------------------|-------|-----|-----|----|-------------------|
|                            |       | X   | Y   | Z  |                   |
| R Postcentral gyrus        | .52   | 60  | -16 | 30 | 876               |
| R Insula                   | .50   | 36  | -20 | 18 |                   |
| R Superior temporal gyrus  | .45   | 54  | -30 | 18 |                   |
| R Supramarginal gyrus      | .44   | 56  | -24 | 18 |                   |
| L Postcentral gyrus        | .54   | -65 | -20 | 28 | 627               |
| L Supramarginal gyrus      | .52   | -62 | -22 | 32 |                   |
| L Insula                   | .43   | -36 | -20 | 18 |                   |
| L Superior temporal gyrus  | .43   | -64 | -30 | 22 |                   |
| L Anterior cingulate       | .46   | 0   | 20  | 28 | 620               |
| R Posterior-medial frontal | .41   | 2   | -14 | 58 |                   |
| R Midcingulate             | .40   | 8   | -14 | 40 |                   |
| L Midcingulate             | .40   | -2  | -4  | 40 |                   |

294  
295

296 ***Genetic influence on functional connectivity during nociceptive processing***

297 During nociceptive processing we observed increases in functional connectivity *between* several  
298 brain networks, including the somatomotor and dorsal attention networks (Fig. 2A, C). The  
299 functional connectivity *within* the default-mode-network decreased during nociceptive processing  
300 and increased *within* the visual network. To estimate the genetic influence on functional  
301 connectivity, we used a permutation test based on network-based statistics (Zalesky et al., 2010).  
302 This approach allowed us to identify a cluster of connections from the full  $h^2$ -matrix (Fig. 2B),  
303 where each connection represents the genetic influence on functional connectivity (Fig. 2D-F)  
304 (thresholded at  $p < 0.05$ , corrected using 1000 permutations). The most conservative threshold  
305 where a significant cluster of connections could be determined ( $h^2$ -component) was  $h^2 = 0.328$  (see  
306 *SI Appendix*, SFig. S5 for other thresholds). The edges of the  $h^2$ -component linked together brain  
307 regions located within as well as outside the Neurologic Pain Signature (Fig. 2F). Nodes within  
308 the  $h^2$ -component were spatially situated in the dorsal posterior insulae, anterior-, mid- and  
309 posterior cingulate cortex, precuneus, and orbitofrontal cortex.

310



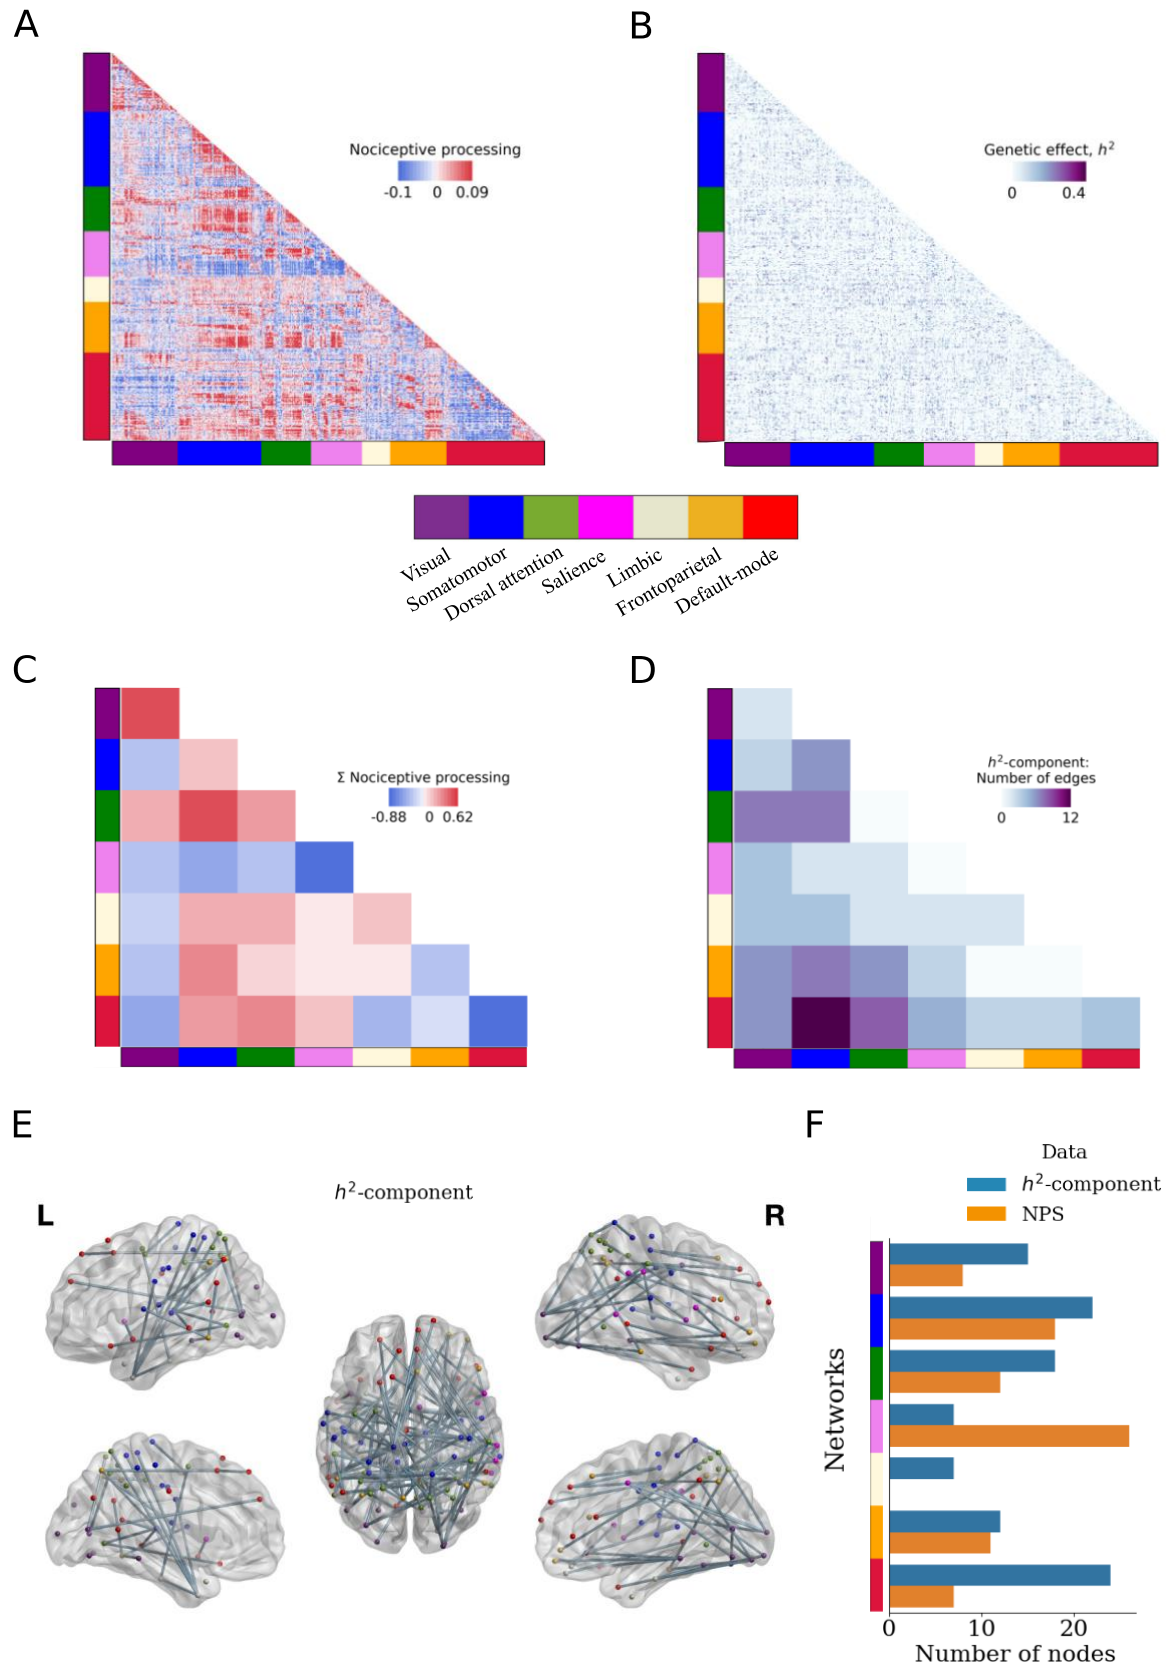

312 **Figure 2.** Twin-data functional connectivity during nociceptive processing. **(A)** Group-averaged  
313 functional connectivity (FC) during nociceptive processing. Positive values (red) indicate edges  
314 with stronger FC during nociceptive processing. **(B)** Unthresholded genetic influence ( $h^2$ ) for every  
315 edge in the functional connectivity during nociceptive processing. **(C)** Graphical summary of the  
316 functional connectivity results in (A). The diagonal squares represent the within-network and off-  
317 diagonal squares represent the between-network sum of functional connectivity during nociceptive  
318 processing. Positive values are represented by warm colors. Minimum and maximum values  
319 denote the mean +/- two standard deviations. **(D)** The number of edges in the connectivity cluster  
320 defined by genetic influence, called the  $h^2$ -component, within and between networks. Dark color  
321 denotes higher number of edges. The largest number of edges was found between the somatomotor  
322 and default-mode network. **(E)** Brain graph representing the  $h^2$ -component from (D). The edges  
323 comprise an  $h^2$ -component that represents significant genetic influences on nociceptive processing  
324 ( $p < 0.05$ , corrected,  $h^2$  threshold = 0.328). Nodes are color-coded according to the network  
325 definitions given in (Yeo et al., 2011). **(F)** The number of nodes in the parcellation scheme that  
326 overlap with the  $h^2$ -component (blue) (defined with a threshold of  $h^2 = 0.328$ ) or the Neurologic  
327 Pain Signature (orange).

328

### 329 *Genetic influence on behavioral sensitivity to electrical stimuli*

330 There was a significant genetic influence on nociceptive thresholds, based on perception-matched  
331 aversive electrical stimuli ( $p < 0.0001$ ,  $h^2 = 0.18$ , on choice of threshold). Estimates of the between-  
332 twin correlation of nociceptive thresholds for monozygotic twins was higher ( $r = 0.18$ , 95% CI =  
333 [-0.02-0.38]) than the between-twin correlation for dizygotic twins ( $r = 0.09$ , 95% CI = [-0.01-  
334 0.19]).

335

### 336 **Discussion**

337 There is high variability in the way humans respond to nociceptive stimuli and express pain, yet  
338 there is little knowledge about the contributions of nature versus nurture to this variation. In this  
339 study, we used a twin-study approach to determine the magnitude and spatial representation of  
340 genetic influences on brain circuits involved in nociceptive processing. We found significant  
341 genetic influence on activity in brain regions typically activated by nociceptive processing (Fig. 1,  
342 Table 1). Interestingly, genetic influence on nociceptive functional connectivity was not restricted  
343 to these areas but also included regions across the brain (Fig. 2D-F).

344

345 Nociceptive responses in bilateral dorsal posterior insulae and mid/anterior cingulate cortex were  
346 influenced by genetics (Fig 1. Table 1), even if the cluster on the contralateral insular side was  
347 more pronounced. Previous studies have suggested that the dorsal posterior insulae may be of  
348 importance for nociceptive processing (Segerdahl, Mezue, Okell, Farrar, & Tracey, 2015). It is a  
349 primary projection point from the ventral medial nucleus of the thalamus and constitutes a core  
350 pathway for nociception in all primates (Craig, 2003). This thalamocortical pathway is believed to  
351 provide a sensory reflection of the condition of the body, and thereby has great evolutionary value  
352 (Craig, 2003). This is corroborated by fMRI data from newborn babies as it reveals a large overlap  
353 between nociceptive processing in adults and infants, including the thalamus, insulae and  
354 mid/anterior cingulate cortex (Goksan et al., 2015). This network could be considered as potential  
355 targets in studies searching for markers of chronic pain and novel treatment, especially for  
356 conditions with known familial risk. Genetic variability is likely to be involved in the mechanisms  
357 underlying some of our most common pain conditions (Parisien et al., 2017) but the mediating

358 mechanisms are poorly understood. The results presented here demonstrate that nociceptive  
359 processing is significantly influenced by genetics and is likely to mediate the different nociceptive  
360 processing seen in individuals with chronic pain (Hashmi et al., 2013; Jensen et al., 2009).

361  
362 Regarding the functional connectivity results, we observed that the nodes within the so-called  $h^2$ -  
363 component (connectivity influenced by genetics) were localized in several different networks,  
364 most notably, the somatomotor, default-mode and dorsal attention networks (Fig. 2D-F). This  
365 indicates that genetic influence on functional connectivity during nociceptive processing  
366 encompasses both sensory and affective-cognitive processes. Since nociception is shaped by  
367 interactions between sensory, cognitive and affective processes there is indeed a possibility that  
368 some aspect of all these components is heritable. As an example, our results on the genetic  
369 influences on brain networks reveal a brain-wide pattern that includes regions implicated in  
370 cognitive-affective processes.

371  
372 Notably, the largest number of connections in the  $h^2$ -component was found between the default-  
373 mode and somatomotor networks (Fig. 2D). This was the case even though functional connectivity  
374 between the two was not the strongest (Fig. 2AC). In terms of functional connectivity, we observed  
375 a decrease in within default-mode network correlation, in line with previous findings (Kong et al.,  
376 2010; Kucyi et al., 2013). The clinical relevance for default-mode network has been observed  
377 previously since the precuneus region was associated with individual differences in pain sensitivity  
378 (Goffaux, Girard-Tremblay, Marchand, Daigle, & Whittingstall, 2014). Furthermore, functional  
379 connectivity was shown to decrease between default-mode network and primary somatosensory  
380 cortex following exacerbated pain in patients with chronic low back pain (Kim et al., 2019). We  
381 show an increase in functional connectivity between the default-mode and the somatomotor  
382 network, and that the largest number of connections were observed between the two in the heritable  
383 cluster. This is relevant to the translational potential between our data and clinical pain. The genetic  
384 influence on default-mode network and somatomotor connectivity, together with previous reports  
385 of altered connectivity in chronic pain, suggest it may serve as an intermediate marker of aberrant  
386 nociception.

387  
388 Here, we isolated the genetic contribution to task-evoked functional connectivity. Yet, several  
389 findings show great similarity between task-evoked and resting-state functional connectivity  
390 (Cole, Bassett, Power, Braver, & Petersen, 2014; Fox & Raichle, 2007). Such similarities,  
391 however, should not be transferred by analogy to a comparison between resting-state and pain-  
392 evoked functional connectivity. Even comparing non-painful and painful stimuli shows marked  
393 differences whereby the former resembles a network formation akin to resting-state (Zheng et al.,  
394 2020). The cluster of edges identified in the present study captures variance associated with  
395 additive genetics supporting the search for a genetically informed neural pain signature (Davis et  
396 al., 2020). Future studies should compare resting-state and pain-evoked functional connectivity  
397 and estimate the extent of their shared genetics and the neural targets of their shared and non-  
398 shared genes.

399  
400 As nociception is represented by activation in several brain regions, it has been difficult to  
401 determine which aspects of nociception are heritable and which ones are shaped by life experience.  
402 The data in the present study provides the first genetically informed nociceptive signature that  
403 distinguishes between heritable and acquired nociceptive responses in the brain. There is currently

404 a need for better characterization of the biological and genetic foundations of the neural  
405 representation of pain. One major reason for the urgency of improving our understanding of the  
406 neural representations of pain is the opioid crisis, where opioid-based analgesics have created a  
407 wave of addiction, leading to overdoses and deaths. One review and a recent consensus paper by  
408 leading pain clinicians and scientists (Davis et al., 2020; Tracey, Woolf, & Andrews, 2019)  
409 explicitly ask for pain biomarkers— verifiable in preclinical models and patients. Stratification  
410 biomarkers may increase the probability of success in pharmacological clinical trials by as much  
411 as 21% in phase III clinical trials in all disease areas (Davis et al., 2020). Our results may help  
412 determine if clinical pain is manifested in genetically inferred nociceptive regions, and hopefully  
413 lead to beneficial sub-grouping and patient stratification.

414  
415 There are several limitations in our study that need to be addressed. First, the experiment also  
416 included a fear conditioning task, which entails a risk that our findings are confounded by cognitive  
417 and affective processes related to learning and anxiety. On the one hand, our analytical approach  
418 isolated the effects of the nociceptive stimulus itself and hopefully minimized any brain activations  
419 related to the fear learning component of the experimental paradigm. On the other hand, there is  
420 an inherent affective component of nociception and it will thus be difficult to remove all fear-  
421 related brain activations as they may also be present during the nociceptive stimulation modeled  
422 in our analysis. Related to this, there are other psychological factors that are heritable, for example  
423 anxiety, that could influence nociceptive processing. We can, therefore, not exclude the  
424 contribution of closely related heritable factors to our findings. For example, genetic factors could  
425 influence anxiety that in turn influence nociceptive processing. Another limitation is that we  
426 examined the genetic influence on nociceptive processing and not subjective pain. While the  
427 nociceptive stimuli in our study represent aversive events in the sensory domain (Lee, Necka, &  
428 Atlas, 2020), participants did not provide subjective ratings of pain. This would have allowed a  
429 clearer relationship between genetic influences on brain activation and functional connectivity  
430 with the subjective pain experience. Further, this study examined only one nociceptive modality –  
431 electrical stimulation. Even if our findings elucidate heritable neural mechanisms that overlap with  
432 findings among patients with clinical pain they may not generalize to a clinical context. If we had  
433 used other nociceptive stimuli that stimulate deeper tissues, and provide C-fiber mediated  
434 activations, it would have made a stronger case for a possible clinical translation. Nevertheless,  
435 the level of the electrical stimuli in this study are comparable to previous studies that studied pain  
436 (Liu et al., 2020). Finally, the sample size is relatively small and may be underpowered to detect  
437 some effects. With our sample size, reaching 80% power ( $p_{\alpha} = 0.05$ ) requires the true effect of  
438 additive genetics to be 0.5. These calculations (Visscher, 2004; Visscher, Gordon, & Neale, 2008)  
439 are, however, based on a generic tool for twin studies and may not be comparable to the statistics  
440 of neuroimaging.

441  
442 To summarize, our findings support the idea that brain regions associated with nociceptive  
443 processing are under significant genetic influence. The genetic influence on functional  
444 connectivity during nociceptive processing is not limited to core nociceptive brain regions, such  
445 as the dorsal posterior insulae and somatosensory areas, but also involves cognitive and affective  
446 brain circuitry. There are efforts to characterize the association between functional brain networks  
447 and gene expression (Richiardi et al., 2015). Future endeavors in the pain field can provide insights  
448 into clinical pain conditions and help improve their treatments.

449

## References

- 450  
451  
452 Adhikari, B. M., Jahanshad, N., Shukla, D., Glahn, D. C., Blangero, J., Fox, P. T., . . . Kochunov,  
453 P. (2018). Comparison of heritability estimates on resting state fMRI connectivity  
454 phenotypes using the ENIGMA analysis pipeline. *Hum Brain Mapp*, 39(12), 4893-4902.  
455 doi:10.1002/hbm.24331
- 456 Alstott, J., Breakspear, M., Hagmann, P., Cammoun, L., & Sporns, O. (2009). Modeling the  
457 impact of lesions in the human brain. *PLoS Comput Biol*, 5(6), e1000408.  
458 doi:10.1371/journal.pcbi.1000408
- 459 Bullmore, E. T., & Bassett, D. S. (2011). Brain graphs: graphical models of the human brain  
460 connectome. *Annu Rev Clin Psychol*, 7, 113-140. doi:10.1146/annurev-clinpsy-040510-  
461 143934
- 462 Chen, X., Formisano, E., Blokland, G. A. M., Strike, L. T., McMahon, K. L., de Zubicaray, G. I.,  
463 . . . Nichols, T. E. (2019). Accelerated estimation and permutation inference for ACE  
464 modeling. *Hum Brain Mapp*. doi:10.1002/hbm.24611
- 465 Colclough, G. L., Smith, S. M., Nichols, T. E., Winkler, A. M., Sotiropoulos, S. N., Glasser, M.  
466 F., . . . Woolrich, M. W. (2017). The heritability of multi-modal connectivity in human  
467 brain activity. *Elife*, 6. doi:10.7554/eLife.20178
- 468 Cole, M. W., Bassett, D. S., Power, J. D., Braver, T. S., & Petersen, S. E. (2014). Intrinsic and  
469 task-evoked network architectures of the human brain. *Neuron*, 83(1), 238-251.  
470 doi:10.1016/j.neuron.2014.05.014
- 471 Craig, A. D. (2003). A new view of pain as a homeostatic emotion. *Trends Neurosci*, 26(6), 303-  
472 307.
- 473 Davis, K. D., Aghaepour, N., Ahn, A. H., Angst, M. S., Borsook, D., Brenton, A., . . .  
474 Pellemounter, M. A. (2020). Discovery and validation of biomarkers to aid the  
475 development of safe and effective pain therapeutics: challenges and opportunities. *Nat*  
476 *Rev Neurol*, 16(7), 381-400. doi:10.1038/s41582-020-0362-2
- 477 Falconer, D., & Mackay, T. (1996). *Introduction to quantitative genetics*. Harlow, England:  
478 Prentice Hall.
- 479 Fornito, A., Zalesky, A., Bassett, D. S., Meunier, D., Ellison-Wright, I., Yucel, M., . . . Bullmore,  
480 E. T. (2011). Genetic influences on cost-efficient organization of human cortical  
481 functional networks. *J Neurosci*, 31(9), 3261-3270. doi:10.1523/JNEUROSCI.4858-  
482 10.2011
- 483 Fox, M. D., & Raichle, M. E. (2007). Spontaneous fluctuations in brain activity observed with  
484 functional magnetic resonance imaging. *Nat Rev Neurosci*, 8(9), 700-711.  
485 doi:10.1038/nrn2201
- 486 Geuter, S., Reynolds Losin, E. A., Roy, M., Atlas, L. Y., Schmidt, L., Krishnan, A., . . .  
487 Lindquist, M. A. (2020). Multiple Brain Networks Mediating Stimulus-Pain  
488 Relationships in Humans. *Cereb Cortex*. doi:10.1093/cercor/bhaa048
- 489 Glahn, D. C., Winkler, A. M., Kochunov, P., Almasy, L., Duggirala, R., Carless, M. A., . . .  
490 Blangero, J. (2010). Genetic control over the resting brain. *Proc Natl Acad Sci U S A*,  
491 107(3), 1223-1228. doi:10.1073/pnas.0909969107
- 492 Goffaux, P., Girard-Tremblay, L., Marchand, S., Daigle, K., & Whittingstall, K. (2014).  
493 Individual differences in pain sensitivity vary as a function of precuneus reactivity. *Brain*  
494 *Topogr*, 27(3), 366-374. doi:10.1007/s10548-013-0291-0



- 495 Goksan, S., Hartley, C., Emery, F., Cockrill, N., Poorun, R., Moultrie, F., . . . Slater, R. (2015).  
496 fMRI reveals neural activity overlap between adult and infant pain. *Elife*, *4*.  
497 doi:10.7554/eLife.06356
- 498 Hashmi, J. A., Baliki, M. N., Huang, L., Baria, A. T., Torbey, S., Hermann, K. M., . . . Apkarian,  
499 A. V. (2013). Shape shifting pain: chronification of back pain shifts brain representation  
500 from nociceptive to emotional circuits. *Brain*, *136*(Pt 9), 2751-2768.  
501 doi:10.1093/brain/awt211
- 502 Holst, K. K., Scheike, T. H., & Hjelmberg, J. B. (2016). The liability threshold model for  
503 censored twin data. *Computational Statistics & Data Analysis*, *93*, 324-335.  
504 doi:10.1016/j.csda.2015.01.014
- 505 Jensen, K. B., Kosek, E., Petzke, F., Carville, S., Fransson, P., Marcus, H., . . . Ingvar, M.  
506 (2009). Evidence of dysfunctional pain inhibition in Fibromyalgia reflected in rACC  
507 during provoked pain. *Pain*, *144*(1-2), 95-100. doi:10.1016/j.pain.2009.03.018
- 508 Jensen, K. B., Regenbogen, C., Ohse, M. C., Frasnelli, J., Freiherr, J., & Lundstrom, J. N.  
509 (2016). Brain activations during pain: a neuroimaging meta-analysis of patients with pain  
510 and healthy controls. *Pain*, *157*(6), 1279-1286. doi:10.1097/j.pain.0000000000000517
- 511 Kim, J., Mawla, I., Kong, J., Lee, J., Gerber, J., Ortiz, A., . . . Napadow, V. (2019).  
512 Somatotopically specific primary somatosensory connectivity to salience and default  
513 mode networks encodes clinical pain. *Pain*, *160*(7), 1594-1605.  
514 doi:10.1097/j.pain.0000000000001541
- 515 Kong, J., Loggia, M. L., Zyloney, C., Tu, P., Laviolette, P., & Gollub, R. L. (2010). Exploring  
516 the brain in pain: activations, deactivations and their relation. *Pain*, *148*(2), 257-267.  
517 doi:10.1016/j.pain.2009.11.008
- 518 Kucyi, A., & Davis, K. D. (2015). The dynamic pain connectome. *Trends Neurosci*, *38*(2), 86-  
519 95. doi:10.1016/j.tins.2014.11.006
- 520 Kucyi, A., Salomons, T. V., & Davis, K. D. (2013). Mind wandering away from pain  
521 dynamically engages antinociceptive and default mode brain networks. *Proc Natl Acad  
522 Sci U S A*, *110*(46), 18692-18697. doi:10.1073/pnas.1312902110
- 523 Lee, I. S., Necka, E. A., & Atlas, L. Y. (2020). Distinguishing pain from nociception, salience,  
524 and arousal: How autonomic nervous system activity can improve neuroimaging tests of  
525 specificity. *Neuroimage*, *204*, 116254. doi:10.1016/j.neuroimage.2019.116254
- 526 Leys, C., Ley, C., Klein, O., Bernard, P., & Licata, L. (2013). Detecting outliers: Do not use  
527 standard deviation around the mean, use absolute deviation around the median. *Journal of  
528 Experimental Social Psychology*, *49*(4), 764-766. doi:10.1016/j.jesp.2013.03.013
- 529 Liu, C., Pu, M., Lian, W., Hu, L., Mobbs, D., & Yu, R. (2020). Conscious awareness  
530 differentially shapes analgesic and hyperalgesic pain responses. *J Exp Psychol Gen*.  
531 doi:10.1037/xge0000759
- 532 McLaren, D. G., Ries, M. L., Xu, G., & Johnson, S. C. (2012). A generalized form of context-  
533 dependent psychophysiological interactions (gPPI): a comparison to standard approaches.  
534 *Neuroimage*, *61*(4), 1277-1286. doi:10.1016/j.neuroimage.2012.03.068
- 535 Miranda-Dominguez, O., Feczko, E., Grayson, D. S., Walum, H., Nigg, J. T., & Fair, D. A.  
536 (2018). Heritability of the human connectome: A connectotyping study. *Netw Neurosci*,  
537 *2*(2), 175-199. doi:10.1162/netn\_a\_00029
- 538 Mogil, J. S. (2012). Pain genetics: past, present and future. *Trends Genet*, *28*(6), 258-266.  
539 doi:10.1016/j.tig.2012.02.004

- 540 Nielsen, C. S., Stubhaug, A., Price, D. D., Vassend, O., Czajkowski, N., & Harris, J. R. (2008).  
541 Individual differences in pain sensitivity: genetic and environmental contributions. *Pain*,  
542 *136*(1-2), 21-29. doi:10.1016/j.pain.2007.06.008
- 543 Norbury, T. A., MacGregor, A. J., Urwin, J., Spector, T. D., & McMahon, S. B. (2007).  
544 Heritability of responses to painful stimuli in women: a classical twin study. *Brain*,  
545 *130*(Pt 11), 3041-3049. doi:10.1093/brain/awm233
- 546 Oertel, B. G., Preibisch, C., Wallenhorst, T., Hummel, T., Geisslinger, G., Lanfermann, H., &  
547 Lotsch, J. (2008). Differential opioid action on sensory and affective cerebral pain  
548 processing. *Clin Pharmacol Ther*, *83*(4), 577-588. doi:10.1038/sj.clpt.6100441
- 549 Parisien, M., Khoury, S., Chabot-Dore, A. J., Sotocinal, S. G., Slade, G. D., Smith, S. B., . . .  
550 Diatchenko, L. (2017). Effect of Human Genetic Variability on Gene Expression in  
551 Dorsal Root Ganglia and Association with Pain Phenotypes. *Cell Rep*, *19*(9), 1940-1952.  
552 doi:10.1016/j.celrep.2017.05.018
- 553 R Core Team. (2017). R: A Language and Environment for Statistical Computing. Vienna,  
554 Austria: R Foundation for Statistical Computing. Retrieved from [https://www.R-](https://www.R-project.org/)  
555 [project.org/](https://www.R-project.org/)
- 556 Reineberg, A. E., Hatoum, A. S., Hewitt, J. K., Banich, M. T., & Friedman, N. P. (2019).  
557 Genetic and Environmental Influence on the Human Functional Connectome. *Cereb*  
558 *Cortex*. doi:10.1093/cercor/bhz225
- 559 Richiardi, J., Altmann, A., Milazzo, A. C., Chang, C., Chakravarty, M. M., Banaschewski, T., . . .  
560 . consortium, I. (2015). Correlated gene expression supports synchronous activity in brain  
561 networks. *Science*, *348*(6240), 1241-1244. doi:10.1126/science.1255905
- 562 Rosen, J., Kastrati, G., Reppling, A., Bergkvist, K., & Ahs, F. (2019). The effect of immersive  
563 virtual reality on proximal and conditioned threat. *Sci Rep*, *9*(1), 17407.  
564 doi:10.1038/s41598-019-53971-z
- 565 Salomons, T. V., Iannetti, G. D., Liang, M., & Wood, J. N. (2016). The "Pain Matrix" in Pain-  
566 Free Individuals. *JAMA Neurol*, *73*(6), 755-756. doi:10.1001/jamaneurol.2016.0653
- 567 Schaefer, A., Kong, R., Gordon, E. M., Laumann, T. O., Zuo, X. N., Holmes, A. J., . . . Yeo, B.  
568 T. T. (2018). Local-Global Parcellation of the Human Cerebral Cortex from Intrinsic  
569 Functional Connectivity MRI. *Cereb Cortex*, *28*(9), 3095-3114.  
570 doi:10.1093/cercor/bhx179
- 571 Scheike, T. H., Holst, K. K., & Hjelmberg, J. B. (2014). Estimating heritability for cause specific  
572 mortality based on twin studies. *Lifetime Data Anal*, *20*(2), 210-233. doi:10.1007/s10985-  
573 013-9244-x
- 574 Segerdahl, A. R., Mezue, M., Okell, T. W., Farrar, J. T., & Tracey, I. (2015). The dorsal  
575 posterior insula subserves a fundamental role in human pain. *Nat Neurosci*, *18*(4), 499-  
576 500. doi:10.1038/nn.3969
- 577 Sporns, O. (2013). Structure and function of complex brain networks. *Dialogues Clin Neurosci*,  
578 *15*(3), 247-262. Retrieved from <https://www.ncbi.nlm.nih.gov/pubmed/24174898>
- 579 Tracey, I., Woolf, C. J., & Andrews, N. A. (2019). Composite Pain Biomarker Signatures for  
580 Objective Assessment and Effective Treatment. *Neuron*, *101*(5), 783-800.  
581 doi:10.1016/j.neuron.2019.02.019
- 582 Tzourio-Mazoyer, N., Landeau, B., Papathanassiou, D., Crivello, F., Etard, O., Delcroix, N., . . .  
583 Joliot, M. (2002). Automated anatomical labeling of activations in SPM using a  
584 macroscopic anatomical parcellation of the MNI MRI single-subject brain. *Neuroimage*,  
585 *15*(1), 273-289. doi:10.1006/nimg.2001.0978

- 586 Vachon-Presseau, E., Tetreault, P., Petre, B., Huang, L., Berger, S. E., Torbey, S., . . . Apkarian,  
587 A. V. (2016). Corticolimbic anatomical characteristics predetermine risk for chronic pain.  
588 *Brain*, 139(Pt 7), 1958-1970. doi:10.1093/brain/aww100
- 589 Visscher, P. M. (2004). Power of the classical twin design revisited. *Twin Res*, 7(5), 505-512.  
590 doi:10.1375/1369052042335250
- 591 Visscher, P. M., Gordon, S., & Neale, M. C. (2008). Power of the classical twin design revisited:  
592 II detection of common environmental variance. *Twin Res Hum Genet*, 11(1), 48-54.  
593 doi:10.1375/twin.11.1.48
- 594 Wager, T. D., Atlas, L. Y., Lindquist, M. A., Roy, M., Woo, C. W., & Kross, E. (2013). An  
595 fMRI-based neurologic signature of physical pain. *N Engl J Med*, 368(15), 1388-1397.  
596 doi:10.1056/NEJMoa1204471
- 597 Walters, E. T., & Williams, A. C. C. (2019). Evolution of mechanisms and behaviour important  
598 for pain. *Philos Trans R Soc Lond B Biol Sci*, 374(1785), 20190275.  
599 doi:10.1098/rstb.2019.0275
- 600 Whitfield-Gabrieli, S., & Nieto-Castanon, A. (2012). Conn: a functional connectivity toolbox for  
601 correlated and anticorrelated brain networks. *Brain Connect*, 2(3), 125-141.  
602 doi:10.1089/brain.2012.0073
- 603 Xia, M., Wang, J., & He, Y. (2013). BrainNet Viewer: a network visualization tool for human  
604 brain connectomics. *PLoS One*, 8(7), e68910. doi:10.1371/journal.pone.0068910
- 605 Xu, J., Yin, X., Ge, H., Han, Y., Pang, Z., Liu, B., . . . Friston, K. (2017). Heritability of the  
606 Effective Connectivity in the Resting-State Default Mode Network. *Cereb Cortex*,  
607 27(12), 5626-5634. doi:10.1093/cercor/bhw332
- 608 Yang, Z., Zuo, X. N., McMahon, K. L., Craddock, R. C., Kelly, C., de Zubicaray, G. I., . . .  
609 Wright, M. J. (2016). Genetic and Environmental Contributions to Functional  
610 Connectivity Architecture of the Human Brain. *Cereb Cortex*, 26(5), 2341-2352.  
611 doi:10.1093/cercor/bhw027
- 612 Yarkoni, T., Poldrack, R. A., Nichols, T. E., Van Essen, D. C., & Wager, T. D. (2011). Large-  
613 scale automated synthesis of human functional neuroimaging data. *Nat Methods*, 8(8),  
614 665-670. doi:10.1038/nmeth.1635
- 615 Yeo, B. T., Krienen, F. M., Sepulcre, J., Sabuncu, M. R., Lashkari, D., Hollinshead, M., . . .  
616 Buckner, R. L. (2011). The organization of the human cerebral cortex estimated by  
617 intrinsic functional connectivity. *J Neurophysiol*, 106(3), 1125-1165.  
618 doi:10.1152/jn.00338.2011
- 619 Zalesky, A., Fornito, A., & Bullmore, E. T. (2010). Network-based statistic: identifying  
620 differences in brain networks. *Neuroimage*, 53(4), 1197-1207.  
621 doi:10.1016/j.neuroimage.2010.06.041
- 622 Zheng, W., Woo, C. W., Yao, Z., Goldstein, P., Atlas, L. Y., Roy, M., . . . Wager, T. D. (2020).  
623 Pain-Evoked Reorganization in Functional Brain Networks. *Cereb Cortex*, 30(5), 2804-  
624 2822. doi:10.1093/cercor/bhz276
- 625 Zubieta, J. K., Heitzeg, M. M., Smith, Y. R., Bueller, J. A., Xu, K., Xu, Y., . . . Goldman, D.  
626 (2003). COMT val158met genotype affects mu-opioid neurotransmitter responses to a  
627 pain stressor. *Science*, 299(5610), 1240-1243. doi:10.1126/science.1078546

628

629 **Funding:** This research was supported by grants from the Swedish Research Council (2014-  
630 01160 and 2018-01322) to FA. **Author Contributions:** J.R and F.Å designed the experiment.  
631 G.K and J.R performed the experiments. G.K and K.J wrote the first draft. All authors

632 substantially revised the manuscript. X.C and T.N contributed with the software. G.K analyzed  
633 the data and G.K, X.C, W.H, T.N, I.T, P.F, F.Å and K.J contributed to interpretation of results.  
634 All authors have read and approved the manuscript. **Competing interests:** H Larsson has served  
635 as a speaker for EvolanPharma and Shire/Takeda and has received research grants from  
636 Shire/Takeda; all outside the submitted work. All other authors declare no competing interests.  
637 **Data and materials availability.** The data generated during the current study are available at  
638 [osf.io](https://osf.io) with DOI 10.17605/OSF.IO/UWYEV. Further data and all the code used to produce  
639 figures and results are available at [https://github.com/granitz/twin\\_pain](https://github.com/granitz/twin_pain).

640

641 **Supplementary Materials:**

642 Figures S1-S5

643 Tables S1

644 Captions for Data S1

645
